# Supplementary material
Source: publisher site journal article supplement (https://www.dovepress.com/article/276715)
Supplement: Supplementary file 1 [file get_supplementary_file.php]

**Appendix 1. Attitude Scales towards Hepatitis B Vaccination**

| **Attitudes**  Please note that we are asking you to indicate the degree to which you would agree or disagree with each item. If you feel that a particular item is strongly agreed, you would circle “1”, If it is strongly disagreed, you would circle “5” | | | | | |
| --- | --- | --- | --- | --- | --- |
|  | **Strongly agree** | **Agree** | **Neither agree nor disagree** | **Disagree** | **Strongly disagree** |
| 1. My child is at high risk for Hepatitis B | 1 | 2 | 3 | 4 | 5 |
| 2. I think my child will get Hepatitis B in future | 1 | 2 | 3 | 4 | 5 |
| 3. My child could be very sick if she/he got HBV | 1 | 2 | 3 | 4 | 5 |
| 4. I am afraid to even think about my child getting sick with HBV | 1 | 2 | 3 | 4 | 5 |
| 5. Immunization will prevent my child from catching HBV | 1 | 2 | 3 | 4 | 5 |
| 6. By being immunized and not getting HBV, my child will protect others from HBV | 1 | 2 | 3 | 4 | 5 |
| 7. Need to get the Hepatitis B vaccination on schedule to prevent my child from getting HBV | 1 | 2 | 3 | 4 | 5 |
| 8. The Hepatitis B vaccine can cause the Adverse Events Following Immunization (AEFIs) | 1 | 2 | 3 | 4 | 5 |
| 9. The Hepatitis B shot can be painful | 1 | 2 | 3 | 4 | 5 |
| 10. It is an inconvenient time to bring my child to get vaccines | 1 | 2 | 3 | 4 | 5 |
| 11. That is an inconvenient location to take my child to get the vaccines | 1 | 2 | 3 | 4 | 5 |
